# Supplementary material for: Appropriate regulation of magnesium on hydroxyapatite crystallization in simulated body fluids
Source: Royal Society of Chemistry journal article supplement (doi:10.1039/d0ce01421d), 2020-11-18
Supplement: d0ce01421d1.pdf [file d0ce01421d1.pdf]

Electronic supplementary information

**Appropriate regulation of magnesium on hydroxyapatite crystallization  
in simulated body fluids**

Shuqin Jiang,<sup>a</sup> Yuanyuan Cao,<sup>a</sup> Chenxi Zong,<sup>b</sup> Yuanfeng Pang<sup>\*a</sup> and Zhiwen Sun<sup>\*a</sup>

<sup>a</sup> School of public health, and department of Toxicology, Capital Medical University, Beijing 100069, China

<sup>b</sup> School of Basic Medicine, Capital Medical University, Beijing 100069, China

\* Email: yuanfengpang@163.com ; zwsun@ccmu.edu.cn

**Tables**

Table S1. The composition of simulated body fluid (SBF).

| <b>Ion.</b> | <b>Na<sup>+</sup></b> | <b>K<sup>+</sup></b> | <b>Mg<sup>2+</sup></b> | <b>Cl<sup>-</sup></b> | <b>SO<sub>4</sub><sup>2-</sup></b> | <b>Ca<sup>2+</sup></b> | <b>HPO<sub>4</sub><sup>2-</sup></b> | <b>HEPES</b> |
|-------------|-----------------------|----------------------|------------------------|-----------------------|------------------------------------|------------------------|-------------------------------------|--------------|
| <b>C/mM</b> | 140                   | 5.0                  | 0-1.5                  | 148-151               | 0.5                                | 5.0                    | 3.0                                 | 10.0         |

Table S2. The chemical analysis of Mg in ACP and HAP in the presence of different Mg<sup>2+</sup> concentrations in SBF solution, or adding 0.5 mM Mg<sup>2+</sup> at different reaction times.

| <b>Group</b> | <b>Mg/Ca molar ration in ACP<br/>(mean ± s.d.)</b> | <b>Mg/Ca molar ration in HAP<br/>(mean ± s.d.)</b> |
|--------------|----------------------------------------------------|----------------------------------------------------|
| 0.2 mM Mg    | 0.019 ± 0.004                                      | 0.017 ± 0.002                                      |
| 0.5 mM Mg    | 0.032 ± 0.002                                      | 0.029 ± 0.002                                      |
| 1.0 mM Mg    | 0.058 ± 0.005                                      | 0.040 ± 0.005                                      |
| 1.5 mM Mg    | 0.070 ± 0.005                                      | 0.047 ± 0.003                                      |
| adding(0)    | 0.032 ± 0.002                                      | 0.029 ± 0.002                                      |
| adding(5)    | 0.013 ± 0.001                                      | 0.032 ± 0.001                                      |
| adding(10)   | 0.010 ± 0.001                                      | 0.028 ± 0.001                                      |
| adding(15)   | 0.008 ± 0.002                                      | 0.028 ± 0.002                                      |

Table S3. The (002) d-spacing, *c* lattice parameter, and lattice distortion of HAP and Mg-doped HAP. The shrinkage of the *c* lattice (lattice distortion) is calculated by  $[c(\text{Mg}) - c(\text{control})] / c(\text{control}) \times 100\%$ .

|                         | 2 $\theta$ (002)<br>(deg.) | (002)<br>d-space (nm) | <i>c</i> lattice<br>parameter<br>(nm) | lattice<br>distortion<br>(%) |
|-------------------------|----------------------------|-----------------------|---------------------------------------|------------------------------|
| HAP (control)           | 25.889                     | 0.3438                | 0.6875                                | control                      |
| 0.2 mM Mg <sup>2+</sup> | 25.911                     | 0.3434                | 0.6869                                | -0.09                        |
| 0.5 mM Mg <sup>2+</sup> | 25.924                     | 0.3433                | 0.6866                                | -0.13                        |
| 1.0 mM Mg <sup>2+</sup> | 25.938                     | 0.3431                | 0.6863                                | -0.18                        |
| 1.5 mM Mg <sup>2+</sup> | 25.978                     | 0.3425                | 0.6850                                | -0.36                        |

## Figures

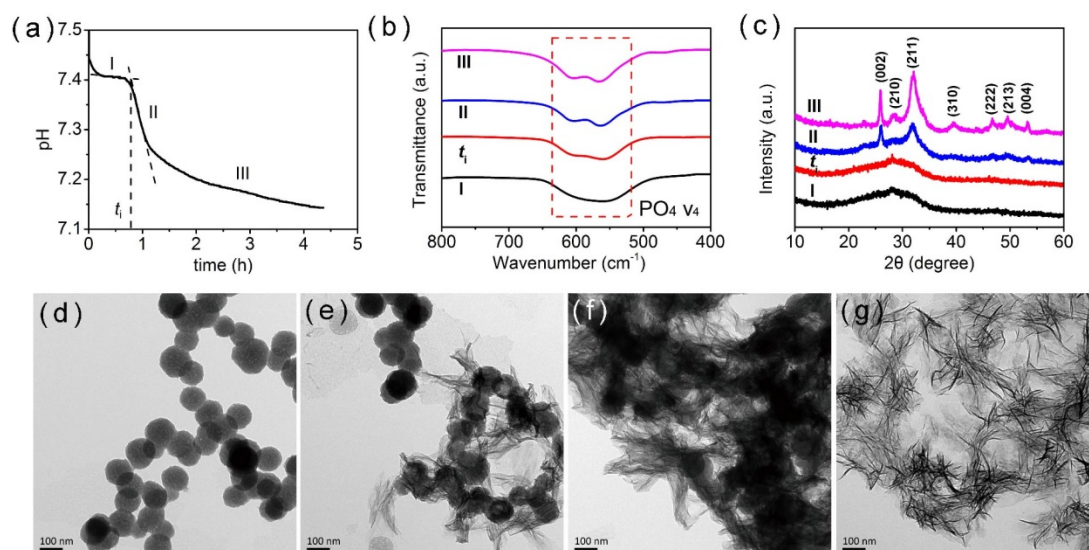

**Fig. S1** HAP crystallization process in the SBF solution with 0.5 mM  $Mg^{2+}$ . (a) A typical pH curve; FTIR (b), XRD (c), and TEM (d-g) characterization of mineral formed in stage I,  $t_i$  (induction time), II, and III.

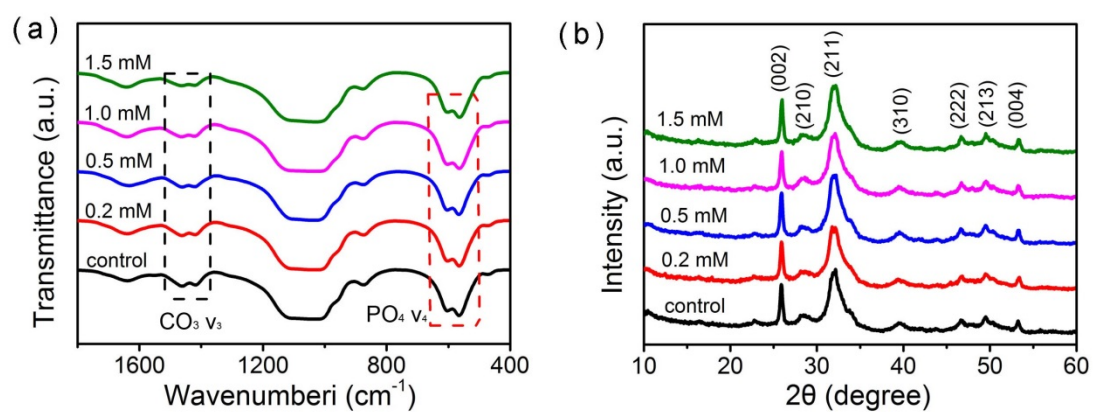

**Fig. S2** FTIR (a) and XRD (b) characterization of final minerals formed at different  $Mg^{2+}$  concentrations.

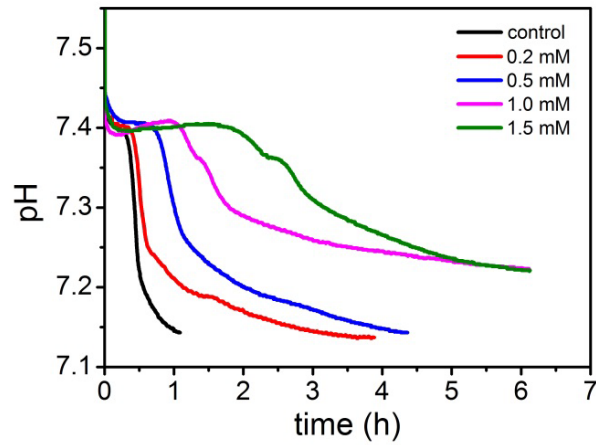

**Fig. S3** The pH curves of SBF solution by adding different  $Mg^{2+}$  concentrations.

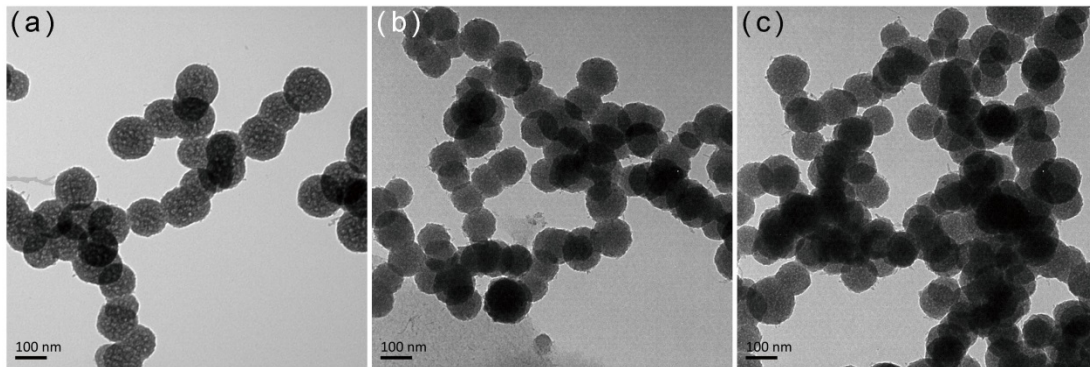

**Fig. S4** The morphology of ACP formed at different reaction times at induction period (in stage I) in control group. (a) 5 min; (b) 10 min; (c) 15 min.

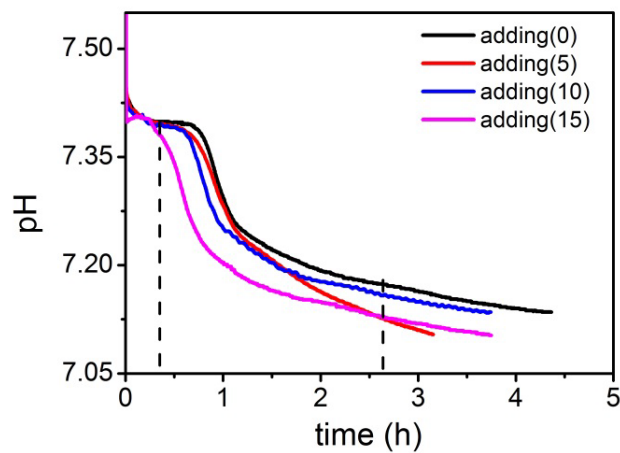

**Fig. S5** The pH curves of SBF solution by adding 0.5 mM  $Mg^{2+}$  at different reaction times.

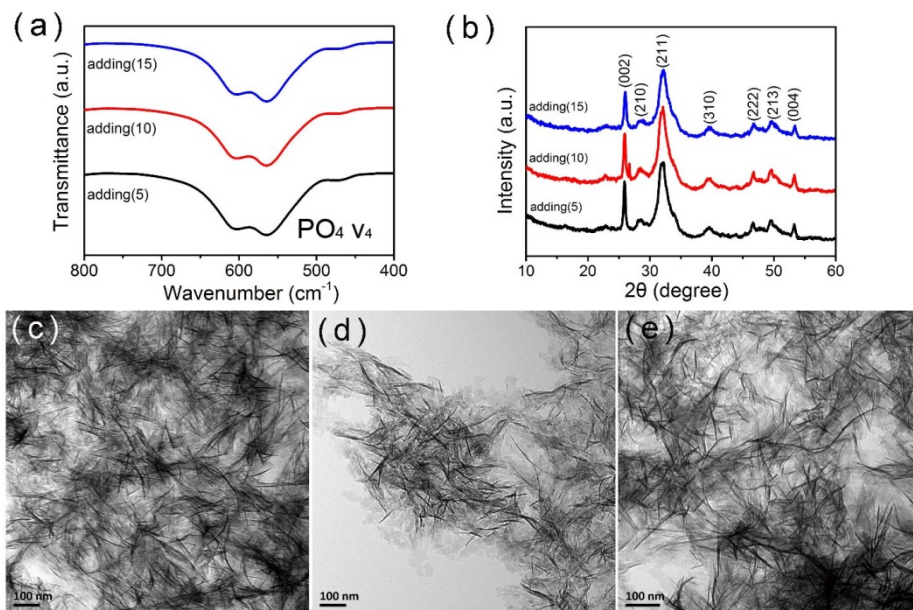

**Fig. S6** FTIR (a), XRD (b), and TEM (c-e) characterization of final minerals formed by adding  $Mg^{2+}$  after ACP formation at 5 min, 10 min and 15 min.

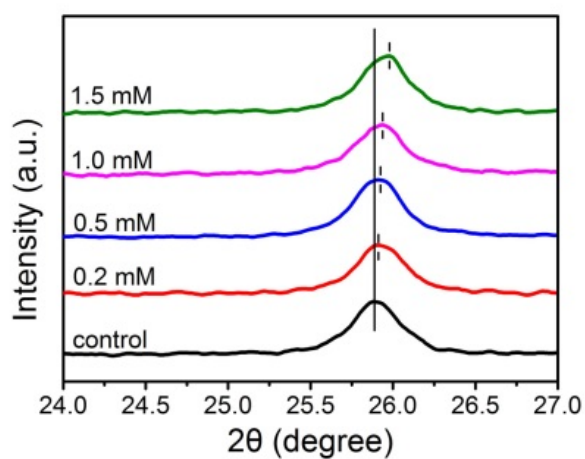

**Fig. S7** The enlarged view of (002) diffraction peak in XRD patterns (Fig. S2b†). The (002) diffraction angle is slightly increased with the increasing  $Mg^{2+}$  concentration.

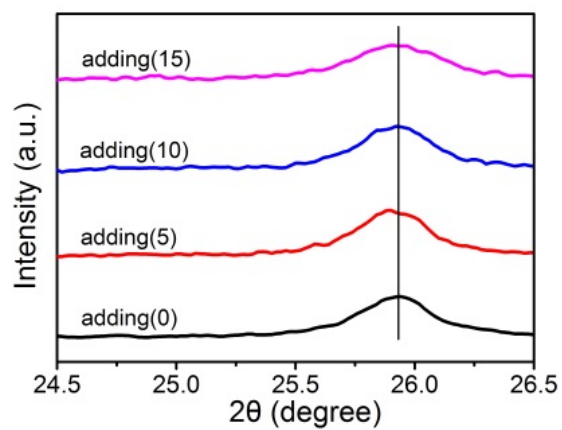

**Fig. S8** The enlarged view of (002) diffraction peak in XRD patterns (Fig. S2b† and Fig. S6b†). The (002) diffraction angle is not evident change when adding 0.5 mM Mg<sup>2+</sup> at different reaction times.

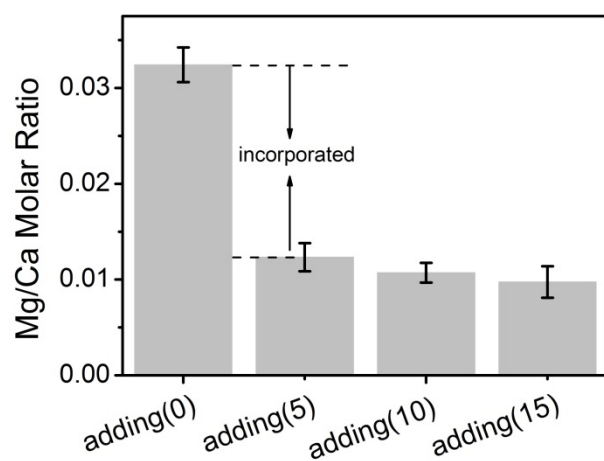

**Fig. S9** The change of Mg<sup>2+</sup> content in ACP by adding 0.5 mM Mg<sup>2+</sup> at different reaction times.

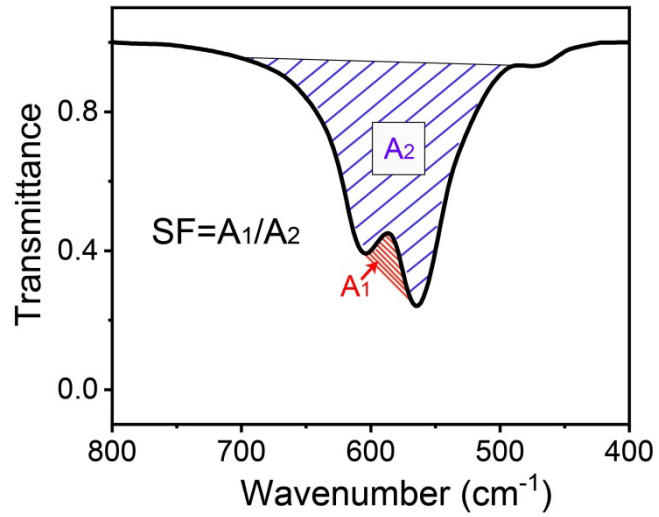

**Fig. S10** Scheme of the calculation of splitting function (SF).  $A_1$  is the area enclosed by the spectrum and the straight line and  $A_2$  is the area enclosed by spectrum and straight baseline, the SF is defined as the ratio of  $A_1$  to  $A_2$ . SF is used as the crystallization indicator of calcium phosphate.
